# Supplementary material for: Evaluation of a Point-of-Care Test for Pre-Vaccination Testing to Detect Antibodies against Canine Adenoviruses in Dogs
Source: MDPI journal article supplement (doi:10.3390/v13020183), 2021-01-26
Supplement: s1 [file s1]

Supplemental File Table 1 Signalment, vaccination status, and health status of the 198 dogs included in the study and anti-canine adenovirus antibody test results of the point-of-care-test and the respective antibody titers in virus neutralization using canine adenovirus-1 and -2.

| privately owned dogs | breed               | sex    | neutering status | age in years | vaccination status | health status                   | point-of-care test result | antibody titer against CAV <sup>1</sup> -1 in virus neutralization | antibody titer against CAV <sup>1</sup> -2 in virus neutralization |
|----------------------|---------------------|--------|------------------|--------------|--------------------|---------------------------------|---------------------------|--------------------------------------------------------------------|--------------------------------------------------------------------|
| 1                    | mix                 | female | intact           | 7            | correct vaccinated | immune-mediated disorder        | positive                  | 160                                                                | 80                                                                 |
| 2                    | mix                 | female | neutered         | 5            | unknown            | tumour                          | negative                  | 160                                                                | 80                                                                 |
| 3                    | Bearded Collie      | female | intact           | 12           | unknown            | endocrine disorder              | positive                  | 320                                                                | 160                                                                |
| 4                    | Labrador            | female | intact           | 11           | correct vaccinated | tumour                          | positive                  | 40                                                                 | 160                                                                |
| 5                    | mix                 | female | neutered         | 11           | unknown            | healthy                         | positive                  | 320                                                                | 160                                                                |
| 6                    | mix                 | female | intact           | 16           | correct vaccinated | tumour                          | negative                  | 160                                                                | 80                                                                 |
| 7                    | Dachshund           | female | intact           | 7            | unknown            | inflammatory/infectious disease | negative                  | 320                                                                | 160                                                                |
| 8                    | French Bulldog      | male   | intact           | 3            | correct vaccinated | inflammatory/infectious disease | negative                  | <10                                                                | <10                                                                |
| 9                    | Caucasian Shepherd  | male   | neutered         | 5            | unknown            | neurologic disorder             | negative                  | 160                                                                | 80                                                                 |
| 10                   | Havanese            | male   | neutered         | 5            | unknown            | inflammatory/infectious disease | negative                  | 80                                                                 | 80                                                                 |
| 11                   | Bernedoodle         | male   | intact           | 1            | correct vaccinated | orthopedic disorder             | positive                  | 640                                                                | 640                                                                |
| 12                   | Golden Retriever    | female | neutered         | 15           | unknown            | tumour                          | negative                  | 80                                                                 | 10                                                                 |
| 13                   | mix                 | female | intact           | 10           | unknown            | tumour                          | positive                  | 160                                                                | 80                                                                 |
| 14                   | Labrador            | female | neutered         | 10           | unknown            | neurologic disorder             | positive                  | 160                                                                | 40                                                                 |
| 15                   | French Bulldog      | male   | intact           | 8            | correct vaccinated | tumour                          | negative                  | 160                                                                | 20                                                                 |
| 16                   | Jack Russel Terrier | male   | intact           | 15           | correct vaccinated | healthy                         | negative                  | 40                                                                 | 10                                                                 |
| 17                   | mix                 | female | neutered         | 7            | unknown            | inflammatory/infectious disease | positive                  | 160                                                                | 160                                                                |

|    |                      |        |          |    |                    |                                 |          |      |      |
|----|----------------------|--------|----------|----|--------------------|---------------------------------|----------|------|------|
| 18 | Golden Retriever     | male   | intact   | 5  | unknown            | tumour                          | negative | 40   | 10   |
| 19 | Irish Setter         | female | intact   | 2  | unknown            | orthopedic disorder             | negative | 20   | 10   |
| 20 | Chihuahua            | male   | neutered | 13 | incomplete         | cardiac disorder                | positive | 640  | 160  |
| 21 | American Akita       | male   | intact   | 5  | correct vaccinated | inflammatory/infectious disease | positive | 2560 | 1280 |
| 22 | Boxer                | male   | intact   | 5  | incomplete         | healthy                         | positive | 160  | 160  |
| 23 | Dachshund            | male   | neutered | 7  | unknown            | various disorder                | positive | 160  | 160  |
| 24 | Jack Russel Terrier  | male   | neutered | 15 | unknown            | orthopedic disorder             | positive | 1280 | 160  |
| 25 | German Shepherd      | male   | neutered | 4  | correct vaccinated | tumour                          | positive | 80   | 20   |
| 26 | Dalmatian            | male   | neutered | 5  | unknown            | orthopedic disorder             | positive | 80   | 20   |
| 27 | Doberman             | male   | intact   | 2  | correct vaccinated | healthy                         | negative | 160  | 40   |
| 28 | mix                  | female | neutered | 15 | incomplete         | inflammatory/infectious disease | negative | 40   | 20   |
| 29 | mix                  | female | neutered | 16 | unknown            | cardiac disorder                | positive | 80   | 40   |
| 30 | mix                  | female | neutered | 15 | correct vaccinated | endocrine disorder              | negative | 160  | 40   |
| 31 | Doberman             | female | intact   | 4  | correct vaccinated | cardiac disorder                | positive | 160  | 160  |
| 32 | Australian Shepherd  | female | intact   | 1  | correct vaccinated | cardiac disorder                | negative | <10  | <10  |
| 33 | German Shorthair     | male   | intact   | 13 | unknown            | neurologic disorder             | negative | 320  | 80   |
| 34 | Australian Shepherd  | male   | neutered | 13 | unknown            | inflammatory/infectious disease | positive | 160  | 320  |
| 35 | Golden Red Retriever | female | intact   | 6  | unknown            | orthopedic disorder             | positive | 640  | 640  |
| 36 | mix                  | male   | neutered | 15 | unknown            | orthopedic disorder             | negative | 20   | 40   |
| 37 | mix                  | female | neutered | 7  | incomplete         | inflammatory/infectious disease | negative | 160  | 40   |

|    |                     |        |          |    |                    |                                 |          |      |      |
|----|---------------------|--------|----------|----|--------------------|---------------------------------|----------|------|------|
| 38 | Boston Terrier      | female | neutered | 11 | correct vaccinated | cardiac disorder                | positive | 40   | 20   |
| 39 | Boxer               | female | intact   | 1  | correct vaccinated | inflammatory/infectious disease | negative | 20   | 20   |
| 40 | Dachshund           | male   | intact   | 12 | correct vaccinated | cardiac disorder                | positive | 640  | 320  |
| 41 | Samoyed             | female | neutered | 11 | unknown            | tumour                          | negative | 160  | 80   |
| 42 | Beardie Pon         | female | intact   | 14 | correct vaccinated | cardiac disorder                | negative | 160  | 80   |
| 43 | Dachshund           | male   | intact   | 11 | unknown            | endocrine disorder              | negative | 160  | 160  |
| 44 | Labrador            | male   | neutered | 11 | unknown            | tumour                          | negative | 160  | 40   |
| 45 | Beagle              | female | neutered | 14 | unknown            | tumour                          | negative | 20   | < 10 |
| 46 | Cocker Spaniel      | male   | neutered | 10 | correct vaccinated | tumour                          | negative | 40   | 40   |
| 47 | Irish Setter        | male   | intact   | 5  | correct vaccinated | neurologic disorder             | positive | 80   | 80   |
| 48 | German Shepherd     | male   | neutered | 12 | unknown            | tumour                          | positive | 2560 | 1280 |
| 49 | Dalmatian           | male   | neutered | 13 | correct vaccinated | neurologic disorder             | negative | 320  | 160  |
| 50 | mix                 | male   | intact   | 11 | correct vaccinated | tumour                          | negative | 80   | 40   |
| 51 | mix                 | male   | neutered | 10 | unknown            | tumour                          | positive | 2560 | 640  |
| 52 | Rhodesian Ridgeback | male   | intact   | 13 | incomplete         | tumour                          | negative | <10  | <10  |
| 53 | Spitz               | male   | neutered | 10 | unknown            | inflammatory/infectious disease | negative | 40   | 40   |
| 54 | French Bulldog      | male   | intact   | 3  | unknown            | various disorder                | negative | 40   | 40   |
| 55 | Doberman            | female | neutered | 5  | unknown            | various disorder                | negative | 80   | 40   |
| 56 | Airdale Terrier     | male   | intact   | 11 | unknown            | tumour                          | negative | 160  | 80   |
| 57 | Jack Russel Terrier | female | intact   | 9  | unknown            | cardiac disorder                | negative | 10   | <10  |

|    |                     |        |          |    |                    |                                 |          |     |     |
|----|---------------------|--------|----------|----|--------------------|---------------------------------|----------|-----|-----|
| 58 | Giant Schnauzer     | female | neutered | 11 | unknown            | tumour                          | positive | 640 | 80  |
| 59 | Chihuahua           | female | intact   | 3  | correct vaccinated | inflammatory/infectious disease | positive | 640 | 640 |
| 60 | mix                 | female | neutered | 13 | unknown            | endocrine disorder              | negative | 80  | 20  |
| 61 | American Bulldog    | male   | neutered | 8  | correct vaccinated | tumour                          | negative | 320 | 160 |
| 62 | Doberman            | male   | intact   | 9  | unknown            | neurologic disorder             | positive | 160 | 80  |
| 63 | Great Dane          | female | intact   | 9  | correct vaccinated | tumour                          | positive | 640 | 320 |
| 64 | Australian Shepherd | female | neutered | 11 | unknown            | tumour                          | negative | <10 | 10  |
| 65 | mix                 | female | neutered | 12 | correct vaccinated | tumour                          | positive | 640 | 320 |
| 66 | Tornjak             | female | neutered | 3  | correct vaccinated | various disorder                | negative | <10 | <10 |
| 67 | mix                 | male   | intact   | 7  | unknown            | orthopedic disorder             | negative | 160 | 80  |
| 68 | mix                 | female | neutered | 4  | correct vaccinated | inflammatory/infectious disease | positive | 320 | 160 |
| 69 | Magyar Vizsla       | male   | intact   | 14 | unknown            | tumour                          | negative | 40  | 10  |
| 70 | Labrador            | male   | neutered | 14 | correct vaccinated | various disorder                | negative | 40  | <10 |
| 71 | Akita Inu           | male   | intact   | 6  | correct vaccinated | various disorder                | positive | 640 | 160 |
| 72 | mix                 | male   | neutered | 11 | unknown            | tumour                          | negative | 160 | 80  |
| 73 | mix                 | male   | neutered | 9  | unknown            | healthy                         | negative | 80  | 40  |
| 74 | Beauceron           | male   | neutered | 11 | correct vaccinated | orthopedic disorder             | negative | 80  | 80  |
| 75 | Shih Tzu            | male   | intact   | 5  | correct vaccinated | cardiac disorder                | negative | 320 | 320 |
| 76 | Boxer               | male   | intact   | 12 | incomplete         | inflammatory/infectious disease | positive | 320 | 160 |
| 77 | French Bulldog      | male   | neutered | 7  | unknown            | tumour                          | positive | 80  | 80  |

|    |                     |        |          |    |                    |                                 |          |      |      |
|----|---------------------|--------|----------|----|--------------------|---------------------------------|----------|------|------|
| 78 | mix                 | female | neutered | 11 | unknown            | tumour                          | negative | 160  | 40   |
| 79 | Pomeranian          | female | intact   | 9  | incomplete         | orthopedic disorder             | positive | 160  | 40   |
| 80 | Newfoundland        | female | neutered | 6  | correct vaccinated | cardiac disorder                | negative | 160  | 80   |
| 81 | mix                 | male   | neutered | 14 | correct vaccinated | orthopedic disorder             | positive | 640  | 1280 |
| 82 | Bracco Italiano     | male   | intact   | 2  | correct vaccinated | inflammatory/infectious disease | negative | <10  | 10   |
| 83 | mix                 | female | neutered | 13 | incomplete         | tumour                          | negative | 80   | 40   |
| 84 | Labrador            | female | intact   | 2  | correct vaccinated | various disorder                | negative | 80   | 40   |
| 85 | English Bulldog     | male   | intact   | 1  | correct vaccinated | inflammatory/infectious disease | positive | 640  | 320  |
| 86 | mix                 | female | intact   | 13 | correct vaccinated | tumour                          | positive | 2560 | 640  |
| 87 | Pug                 | male   | intact   | 8  | unknown            | orthopedic disorder             | positive | 80   | 80   |
| 88 | Golden Retriever    | female | neutered | 13 | correct vaccinated | tumour                          | positive | 40   | 160  |
| 89 | Podenco Canario     | female | neutered | 13 | unknown            | inflammatory/infectious disease | negative | 20   | <10  |
| 90 | Pug                 | female | intact   | 11 | unknown            | various disorder                | positive | 320  | 160  |
| 91 | Australian Shepherd | male   | intact   | 2  | correct vaccinated | neurologic disorder             | negative | 160  | 80   |
| 92 | mix                 | female | intact   | 1  | correct vaccinated | inflammatory/infectious disease | positive | 160  | 80   |
| 93 | Hovawart            | female | neutered | 9  | incomplete         | cardiac disorder                | positive | 160  | 80   |
| 94 | Bearded Collie      | male   | intact   | 9  | correct vaccinated | orthopedic disorder             | positive | 80   | 40   |
| 95 | Pug                 | male   | intact   | 10 | unknown            | tumour                          | positive | 320  | 160  |
| 96 | Eurasier            | female | neutered | 7  | correct vaccinated | various disorder                | negative | 40   | 160  |
| 97 | German Shepherd     | male   | intact   | 3  | correct vaccinated | inflammatory/infectious disease | positive | 320  | 160  |

|     |                          |        |          |      |                    |                                 |          |     |      |
|-----|--------------------------|--------|----------|------|--------------------|---------------------------------|----------|-----|------|
| 98  | Golden Retriever         | male   | intact   | 12   | correct vaccinated | neurologic disorder             | positive | 20  | 20   |
| 99  | Jack Russel Terrier      | female | neutered | 1    | correct vaccinated | healthy                         | positive | 160 | 80   |
| 100 | Labrador                 | male   | intact   | 14   | correct vaccinated | cardiac disorder                | negative | 80  | <10  |
| 101 | Miniature Dachshund      | female | intact   | 0.25 | incomplete         | inflammatory/infectious disease | negative | <10 | <10  |
| 102 | German Shorthair         | male   | intact   | 7    | unknown            | orthopedic disorder             | negative | 80  | 160  |
| 103 | mix                      | female | intact   | 13   | correct vaccinated | tumour                          | positive | 40  | 20   |
| 104 | Beagle                   | male   | intact   | 1    | incomplete         | inflammatory/infectious disease | negative | 160 | 80   |
| 105 | mix                      | female | intact   | 16   | correct vaccinated | neurologic disorder             | positive | 10  | 20   |
| 106 | Weimaraner               | male   | intact   | 3    | correct vaccinated | neurologic disorder             | negative | 160 | 160  |
| 107 | Labradoodle              | female | intact   | 7    | incomplete         | various disorder                | negative | 160 | 160  |
| 108 | German Shorthair         | female | neutered | 3    | correct vaccinated | inflammatory/infectious disease | positive | 640 | 1280 |
| 109 | German Shepherd          | male   | intact   | 10   | incomplete         | tumour                          | negative | 80  | 40   |
| 110 | Border Collie            | female | intact   | 15   | correct vaccinated | neurologic disorder             | positive | 80  | 80   |
| 111 | Boxer                    | female | intact   | 8    | correct vaccinated | tumour                          | positive | 40  | 10   |
| 112 | Doberman                 | male   | intact   | 4    | unknown            | cardiac disorder                | positive | 320 | 160  |
| 113 | Jack Russel Terrier      | female | intact   | 10   | unknown            | tumour                          | positive | 320 | 160  |
| 114 | Weimaraner               | female | neutered | 5    | correct vaccinated | tumour                          | positive | 640 | 320  |
| 115 | Weimaraner               | male   | neutered | 7    | correct vaccinated | orthopedic disorder             | positive | 40  | 40   |
| 116 | English Springer Spaniel | female | neutered | 9    | unknown            | inflammatory/infectious disease | positive | 10  | 40   |
| 117 |                          | female | neutered | 4    | correct vaccinated | healthy                         | positive | <10 | 40   |

|     |                               |        |          |    |                    |                                 |          |     |     |
|-----|-------------------------------|--------|----------|----|--------------------|---------------------------------|----------|-----|-----|
| 118 | mix                           | female | neutered | 10 | incomplete         | healthy                         | positive | 40  | 80  |
| 119 | mix                           | female | neutered | 11 | incomplete         | healthy                         | positive | 160 | 320 |
| 120 | mix                           | male   | neutered | 17 | correct vaccinated | healthy                         | positive | 160 | 160 |
| 121 | mix                           | female | neutered | 9  | correct vaccinated | healthy                         | positive | 80  | 80  |
| 122 | Labrador                      | female | neutered | 13 | correct vaccinated | healthy                         | positive | 40  | 160 |
| 123 | Labrador                      | female | neutered | 7  | correct vaccinated | healthy                         | positive | <10 | 40  |
| 124 | mix                           | female | neutered | 12 | incomplete         | healthy                         | positive | 80  | 80  |
| 125 | Golden Retriever              | female | neutered | 14 | incomplete         | tumour                          | positive | 80  | 80  |
| 126 | Dachshund                     | male   | intact   | 7  | unknown            | orthopedic disorder             | positive | 80  | 160 |
| 127 | Australian Shepherd           | male   | neutered | 11 | unknown            | tumour                          | positive | 640 | 640 |
| 128 | Doberman                      | male   | neutered | 12 | unknown            | tumour                          | positive | 20  | 10  |
| 129 | Newfoundland                  | female | intact   | 2  | correct vaccinated | orthopedic disorder             | positive | 320 | 160 |
| 130 | Doberman                      | female | intact   | 3  | correct vaccinated | healthy                         | positive | 20  | 20  |
| 131 | German shepherd               | female | neutered | 7  | correct vaccinated | inflammatory/infectious disease | positive | 640 | 640 |
| 132 | Dachshund                     | male   | intact   | 5  | unknown            | inflammatory/infectious disease | positive | <10 | <10 |
| 133 | Labrador                      | male   | intact   | 9  | unknown            | orthopedic disorder             | positive | 160 | 80  |
| 134 | Dachshund                     | male   | intact   | 12 | unknown            | various disorder                | positive | <10 | <10 |
| 135 | Cavalier King Charles Spaniel | male   | neutered | 9  | correct vaccinated | inflammatory/infectious disease | positive | 20  | <10 |
| 136 | Foxhound                      | male   | neutered | 7  | correct vaccinated | inflammatory/infectious disease | positive | 40  | 80  |
| 137 | Strobel                       | male   | neutered | 13 | incomplete         | tumour                          | negative | 10  | 40  |

|     |                       |        |          |    |                    |                                 |          |      |     |
|-----|-----------------------|--------|----------|----|--------------------|---------------------------------|----------|------|-----|
| 138 | West Highland Terrier | female | neutered | 16 | incomplete         | cardiac disorder                | negative | 160  | 80  |
| 139 | mix                   | female | neutered | 8  | unknown            | inflammatory/infectious disease | positive | 40   | 80  |
| 140 | Portuguese Podengo    | female | neutered | 15 | correct vaccinated | inflammatory/infectious disease | positive | 1280 | 640 |
| 141 | mix                   | female | neutered | 7  | unknown            | tumour                          | positive | 640  | 320 |
| 142 | Keeshond              | male   | intact   | 9  | correct vaccinated | healthy                         | positive | 320  | 160 |
| 143 | Collie                | female | intact   | 12 | correct vaccinated | tumour                          | negative | 160  | 80  |
| 144 | mix                   | male   | neutered | 3  | unknown            | neurologic disorder             | negative | 1280 | 320 |
| 145 | Belgian Shepherd      | male   | neutered | 11 | correct vaccinated | tumour                          | negative | 20   | 40  |
| 146 | Parson Russel Terrier | male   | intact   | 6  | correct vaccinated | neurologic disorder             | negative | 160  | 80  |
| 147 | German Shorthair      | female | neutered | 14 | correct vaccinated | cardiac disorder                | negative | 320  | 80  |
| 148 | mix                   | female | neutered | 16 | incomplete         | cardiac disorder                | negative | <10  | <10 |
| 149 | Doberman              | female | intact   | 2  | unknown            | cardiac disorder                | negative | 320  | 80  |
| 150 | Beagle                | male   | intact   | 11 | incomplete         | cardiac disorder                | negative | 10   | 20  |
| 151 | Small Münsterländer   | female | intact   | 10 | correct vaccinated | tumour                          | positive | 1280 | 640 |
| 152 | Bernese Mountain Dog  | female | neutered | 5  | incomplete         | inflammatory/infectious disease | negative | 160  | 160 |
| 153 | mix                   | male   | neutered | 9  | correct vaccinated | various disorder                | positive | 320  | 160 |
| 154 | Doberman              | female | intact   | 6  | correct vaccinated | cardiac disorder                | positive | <10  | <10 |
| 155 | Australian Cattle Dog | male   | intact   | 8  | correct vaccinated | neurologic disorder             | positive | 20   | 20  |
| 156 | Parson Russel Terrier | male   | intact   | 12 | incomplete         | cardiac disorder                | positive | 40   | 160 |
| 157 | Labrador              | male   | neutered | 8  | correct vaccinated | various disorder                | positive | 320  | 160 |



|     |                         |        |          |    |                    |                                 |          |     |     |
|-----|-------------------------|--------|----------|----|--------------------|---------------------------------|----------|-----|-----|
| 158 | Bernese Mountain Dog    | male   | intact   | 7  | correct vaccinated | tumour                          | positive | 10  | 20  |
| 159 | Black Russian Terrier   | female | intact   | 10 | unknown            | inflammatory/infectious disease | positive | 80  | 40  |
| 160 | Beagle                  | female | neutered | 5  | correct vaccinated | various disorder                | positive | 160 | 160 |
| 161 | mix                     | female | neutered | 9  | correct vaccinated | healthy                         | positive | 320 | 160 |
| 162 | French Bulldog          | female | intact   | 2  | correct vaccinated | inflammatory/infectious disease | positive | <10 | <10 |
| 163 | Doberman                | male   | neutered | 7  | correct vaccinated | cardiac disorder                | negative | 10  | 20  |
| 164 | Small Münsterländer     | male   | neutered | 13 | correct vaccinated | endocrine disorder              | positive | <10 | <10 |
| 165 | Doberman                | female | neutered | 6  | correct vaccinated | neurologic disorder             | negative | 40  | 40  |
| 166 | American Cocker Spaniel | male   | intact   | 9  | correct vaccinated | cardiac disorder                | negative | 40  | 80  |
| 167 | Labrador                | male   | intact   | 8  | unknown            | tumour                          | negative | 20  | 20  |
| 168 | Golden Retriever        | male   | neutered | 11 | correct vaccinated | tumour                          | negative | 160 | 40  |
| 169 | mix                     | male   | neutered | 10 | incomplete         | inflammatory/infectious disease | negative | 40  | 40  |
| 170 | Labrador                | female | neutered | 10 | unknown            | neurologic disorder             | negative | 80  | 40  |
| 171 | mix                     | female | neutered | 9  | correct vaccinated | healthy                         | negative | 80  | 80  |
| 172 | Black Russian Terrier   | female | intact   | 6  | correct vaccinated | endocrine disorder              | negative | 40  | 80  |
| 173 | Border Collie           | male   | intact   | 3  | correct vaccinated | neurologic disorder             | negative | 160 | 80  |
| 174 | English Setter          | male   | neutered | 2  | correct vaccinated | orthopedic disorder             | negative | 160 | 160 |
| 175 | German Shepherd         | female | intact   | 9  | correct vaccinated | orthopedic disorder             | negative | 80  | 40  |
| 176 | mix                     | male   | intact   | 15 | correct vaccinated | neurologic disorder             | negative | 40  | 40  |

|     |                     |        |          |    |                    |                                 |          |     |      |
|-----|---------------------|--------|----------|----|--------------------|---------------------------------|----------|-----|------|
| 177 | mix                 | female | neutered | 16 | correct vaccinated | inflammatory/infectious disease | negative | 320 | 160  |
| 178 | Labrador            | male   | neutered | 6  | correct vaccinated | inflammatory/infectious disease | negative | 160 | 80   |
| 179 | Australian Shepherd | female | neutered | 10 | correct vaccinated | cardiac disorder                | negative | 40  | 20   |
| 180 | French Bulldog      | female | intact   | 2  | unknown            | healthy                         | negative | 160 | 160  |
| 181 | Golden Retriever    | female | neutered | 14 | correct vaccinated | endocrine disorder              | positive | 20  | 40   |
| 182 | Hovawart            | male   | intact   | 4  | correct vaccinated | inflammatory/infectious disease | positive | 20  | 80   |
| 183 | Husky               | female | intact   | 12 | unknown            | tumour                          | negative | 40  | 40   |
| 184 | White Shepherd      | female | neutered | 8  | correct vaccinated | orthopedic disorder             | positive | 160 | 80   |
| 185 | mix                 | male   | neutered | 11 | incomplete         | various disorder                | negative | 320 | 80   |
| 186 | Doberman            | male   | intact   | 1  | correct vaccinated | orthopedic disorder             | negative | 40  | 160  |
| 187 | Golden Retriever    | male   | neutered | 11 | incomplete         | tumour                          | positive | 160 | 160  |
| 188 | Doberman            | female | neutered | 9  | correct vaccinated | cardiac disorder                | positive | 20  | 10   |
| 189 | Shetland Sheepdog   | male   | intact   | 7  | correct vaccinated | inflammatory/infectious disease | positive | 40  | 40   |
| 190 | mix                 | female | neutered | 12 | incomplete         | tumour                          | negative | 320 | 160  |
| 191 | Shih Tzu            | female | intact   | 10 | correct vaccinated | healthy                         | positive | 640 | 1280 |
| 192 | mix                 | female | neutered | 3  | incomplete         | inflammatory/infectious disease | positive | 640 | 640  |
| 193 | Beagle              | female | intact   | 3  | correct vaccinated | inflammatory/infectious disease | negative | 640 | 320  |
| 194 | mix                 | male   | intact   | 5  | correct vaccinated | inflammatory/infectious disease | negative | 160 | 80   |
| 195 | Beagle              | male   | intact   | 5  | unknown            | healthy                         | positive | 80  | 40   |
| 196 | mix                 | female | neutered | 12 | correct vaccinated | orthopedic disorder             | positive | 160 | 80   |

|     |        |        |          |    |                    |                    |          |     |     |
|-----|--------|--------|----------|----|--------------------|--------------------|----------|-----|-----|
| 197 | Beagle | female | intact   | 9  | unknown            | healthy            | negative | <10 | 40  |
| 198 | mix    | female | neutered | 14 | correct vaccinated | endocrine disorder | positive | 320 | 320 |

<sup>1</sup>CAV, canine adenovirus
